# Supplementary material for: TCP4-dependent induction of CONSTANS transcription requires GIGANTEA in photoperiodic flowering in Arabidopsis
Source: PLoS Genet. 2017 Jun 19;13(6):e1006856. doi: 10.1371/journal.pgen.1006856 (PMC5495492; doi:10.1371/journal.pgen.1006856)
Supplement: S3 Table — (XLSX) [file pgen.1006856.s013.xlsx]

## Sheet: phosphorylation peptides
	Number of peptides identified in the 35S:TCP4-3F6H
Petide seqence (* phosphorylated residue)	total	WT	gi-2	position
STS*DAADGGCGEIVEVQGGHIVR.S	28	15	13	aa21
TNS*QNQDLR.L	9	5	5	aa221
FQGQEEEQHDGLTHKPSSAS*SISR.H	3	2	1	aa415
FQGQEEEQHDGLTHKPS*SASSISR.H	13	7	6	aa412
FQGQEEEQHDGLTHKPSS*ASSISR.H	6	3	3	aa413
GPLQSSYS*PMIR.A	4	2	2	aa340
FQGQEEEQHDGLT*HKPSSASSISR.H	4	1	3	aa408
ST*SDAADGGCGEIVEVQGGHIVR.S	1	0	1	aa20
S*TSDAADGGCGEIVEVQGGHIVR.S	2	1	1	aa19

## Sheet: Ubiquitinated peptides
	Number of peptides identified in the 35S:TCP4-3F6H
Petide seqence (* Ubiquitinateded residue)	total	WT	gi-2	position
FQGQEEEQHDGLTHK*PSSASSISR.H	13	8	5	aa410
AK*TSIDELAELPPWNPADAIR.L	2	2	0	aa97
